# Supplementary material for: Co3O4@PEI/Ti3C2Tx MXene nanocomposites for a highly sensitive NOx gas sensor with a low detection limit
Source: Royal Society of Chemistry journal article supplement (doi:10.1039/d0ta11392a), 2021-01-01
Supplement: d0ta11392a1.pdf [file d0ta11392a1.pdf]

## Electronic Supplementary Information

### **Co<sub>3</sub>O<sub>4</sub>@PEI/Ti<sub>3</sub>C<sub>2</sub>T<sub>x</sub> MXene nanocomposites for highly sensitive NO<sub>x</sub> gas sensor with low detection limit**

Baihe Sun ‡<sup>a</sup>, He Lv ‡<sup>a</sup>, Zhuo Liu<sup>a</sup>, Jue Wang<sup>a</sup>, Xue Bai<sup>a</sup>, Yang Zhang<sup>a</sup>, Junkun Chen<sup>a</sup>, Kan Kan<sup>\*b</sup>, and Keying Shi<sup>\*a</sup>

<sup>a</sup> Key Laboratory of Functional Inorganic Material Chemistry, Ministry of Education. School of Chemistry and Material Science, Heilongjiang University, Harbin, 150080, P. R. China. E-mail: shikeying2008@163.com

<sup>b</sup> Heilongjiang Academy of Sciences, Institute of Advanced Technology, Harbin 150020, P. R. China. E-mail: kankan.has@foxmail.com

‡ These authors contributed equally to this work.

**Table S1** Comparison of the gas sensing characteristics of MXene based materials reported in literature and in present work.

| Sensor material                                                                | Operating temperature | Gas                   | Response/ Gas concentration | Response time      | Recovery time    | Detection limit                                        | Ref.             |
|--------------------------------------------------------------------------------|-----------------------|-----------------------|-----------------------------|--------------------|------------------|--------------------------------------------------------|------------------|
| Delaminated Ti <sub>3</sub> C <sub>2</sub> T <sub>x</sub> MXene                | RT                    | H <sub>2</sub> O      | 26.1/<br>80±5%              | -                  | -                | -                                                      | 21               |
| Metallic Ti <sub>3</sub> C <sub>2</sub> T <sub>x</sub> MXene                   | RT                    | ethanol               | 1.7/<br>100 ppm             | -                  | -                | 100 ppb                                                | 22               |
| TiO <sub>2</sub> /Ti <sub>3</sub> C <sub>2</sub> T <sub>x</sub>                | RT                    | NH <sub>3</sub>       | 3.1%/<br>10 ppm             | 33 s               | 277 s            | -                                                      | 23               |
| PANI/Ti <sub>3</sub> C <sub>2</sub> T <sub>x</sub>                             | RT                    | ethanol               | 41.1%/<br>200 ppm           | 0.4 s              | 0.5 s            | -                                                      | 24               |
| MXene@Pd CNC film                                                              | RT                    | H <sub>2</sub>        | 23±4%/4%                    | 32±7 s             | -                | -                                                      | 25               |
| W <sub>18</sub> O <sub>49</sub> /Ti <sub>3</sub> C <sub>2</sub> T <sub>x</sub> | 300 °C                | acetone               | 11.6/<br>20 ppm             | 5.6 s<br>(170 ppb) | 6 s<br>(170 ppb) | 170 ppb                                                | 26               |
| TiO <sub>2</sub> /Ti <sub>3</sub> C <sub>2</sub> Mxene                         | RT                    | NO <sub>2</sub>       | 16.02%/<br>5 ppm            | -                  | -                | 125 ppb                                                | 28               |
| 3D Ti <sub>3</sub> C <sub>2</sub> T <sub>x</sub> /ZnO spheres                  | RT                    | NO <sub>2</sub>       | 41.93%/<br>100 ppm          | 34 s               | 103 s            | -                                                      | 29               |
| Alkalized Ti <sub>3</sub> C <sub>2</sub> T <sub>x</sub>                        | RT                    | NH <sub>3</sub>       | 28.87%/<br>100 ppm          | -                  | -                | -                                                      | 35               |
| 3D Mxene framework                                                             | RT                    | ethanol               | 4.4%/<br>5 ppm              | Less than<br>12 s  | Less than<br>12s | 50 ppb                                                 | 44               |
| CuO/Ti <sub>3</sub> C <sub>2</sub> T <sub>x</sub>                              | 250 °C                | toluene               | 11.4/<br>50 ppm             | 270 s              | 10 s             | -                                                      | S1               |
| MXene/SnO <sub>2</sub>                                                         | RT                    | NH <sub>3</sub>       | 40%/<br>50 ppm              | 36 s               | 44 s             | -                                                      | S2               |
| PSS/MXene composites                                                           | RT                    | NH <sub>3</sub>       | 36.6%/<br>100 ppm           | 116 s              | 40 s             | -                                                      | S3               |
| single-layer Ti <sub>3</sub> C <sub>2</sub> -MXene                             | RT                    | NH <sub>3</sub>       | 6.13%/<br>500 ppm           | -                  | -                | 10 ppm                                                 | S4               |
| <b>CoPM-24</b>                                                                 | <b>RT</b>             | <b>NO<sub>x</sub></b> | <b>27.9/100 ppm</b>         | <b>2 s</b>         | <b>73 s</b>      | <b>30ppb<br/>(experiment)<br/>12.7ppb<br/>(theory)</b> | <b>This work</b> |

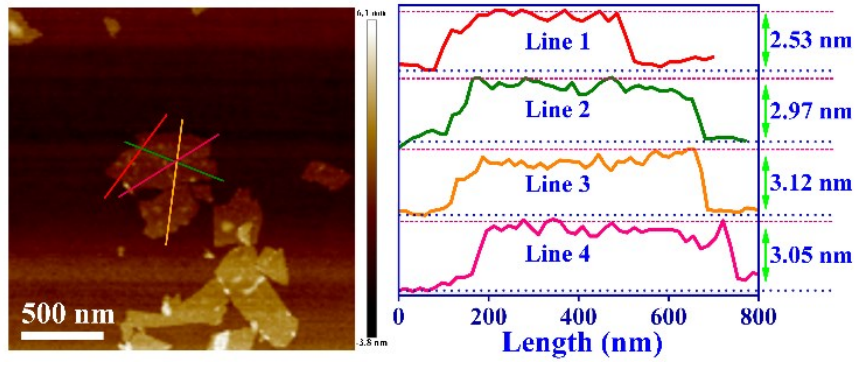

**Fig. S1** AFM images and height profiles of  $\text{Ti}_3\text{C}_2\text{T}_x$  MXene nanosheets.

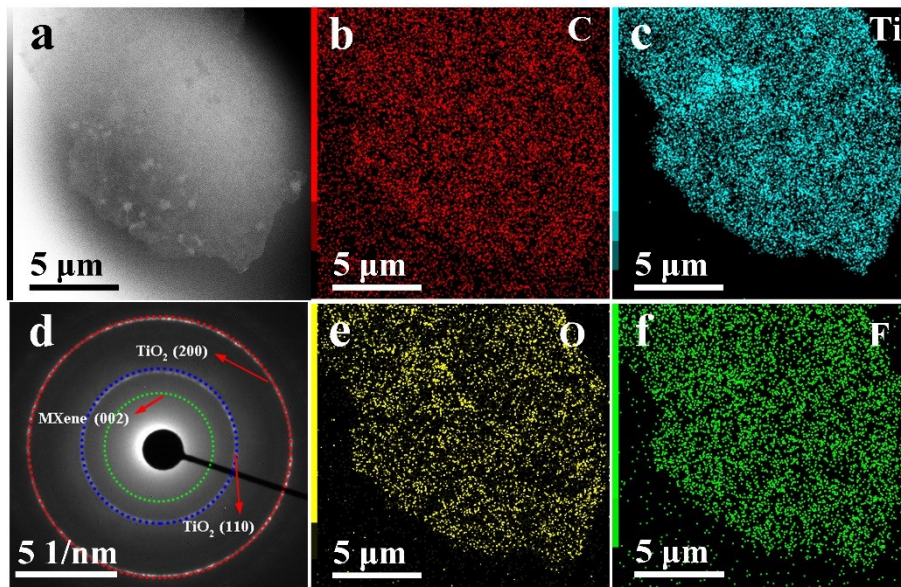

**Fig. S2** TEM images (a) and EDS elemental mapping analysis (b-c, e-f) and EDS image (d) of  $\text{Ti}_3\text{C}_2\text{T}_x$  MXene.

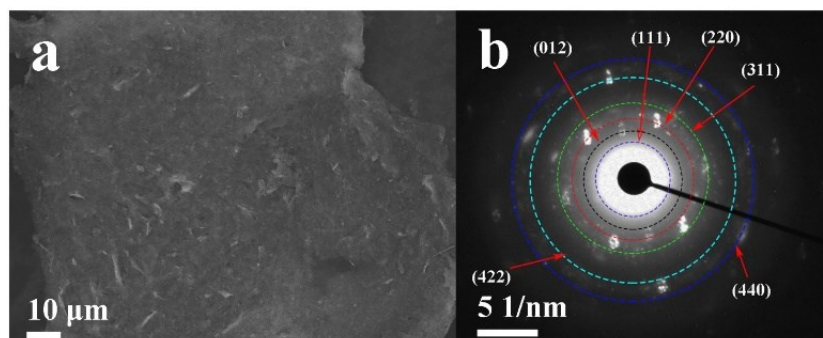

**Fig. S3** SEM images (a) and SAED (b) of CoPM-24.

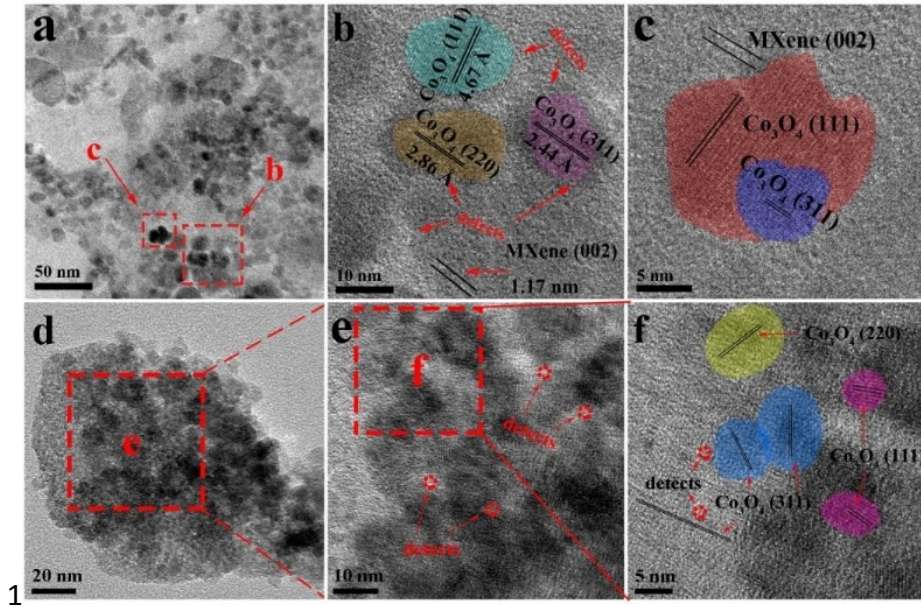

Fig. S4 TEM and HRTEM images of the CoPM-18 (a-c) and CoPM-30 (d-f).

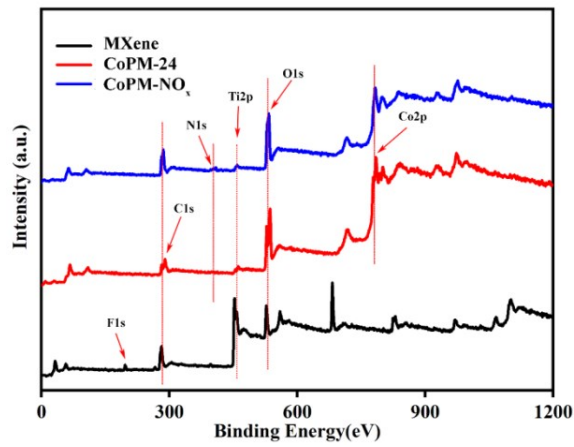

Fig. S5 XPS survey spectra of  $\text{Ti}_3\text{C}_2\text{T}_x$  MXene, CoPM-24 and CoPM- $\text{NO}_x$ .

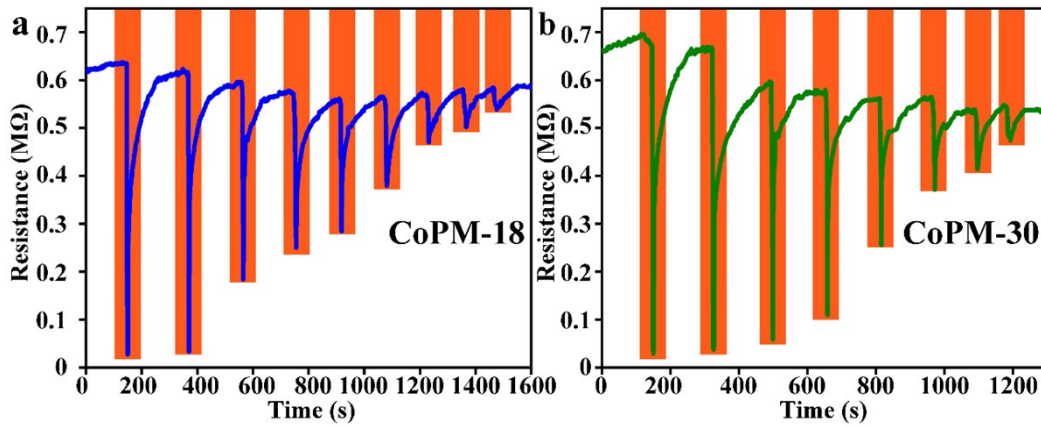

Fig. S6 Dynamic response-recovery curve of (a) CoPM-18 and (b) CoPM-30 sensors.

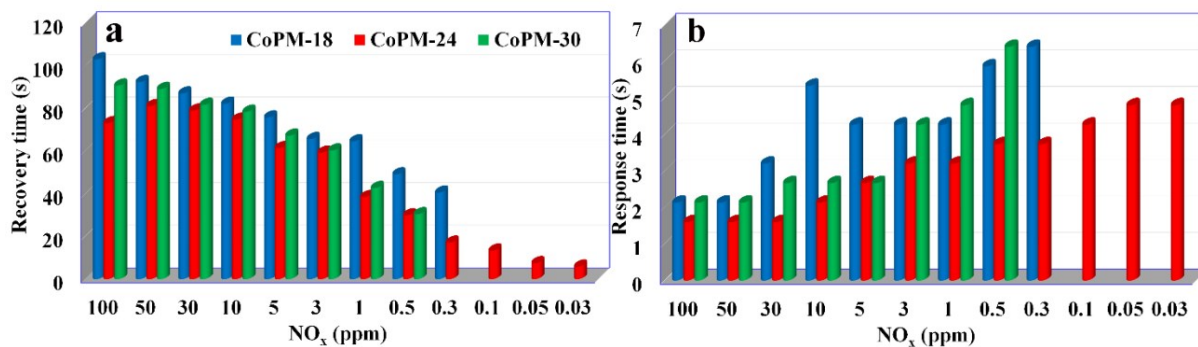

Fig. S7 the response times (a) and the recovery times (b) of CoPM-18, CoPM-24 and CoPM-30 sensors.

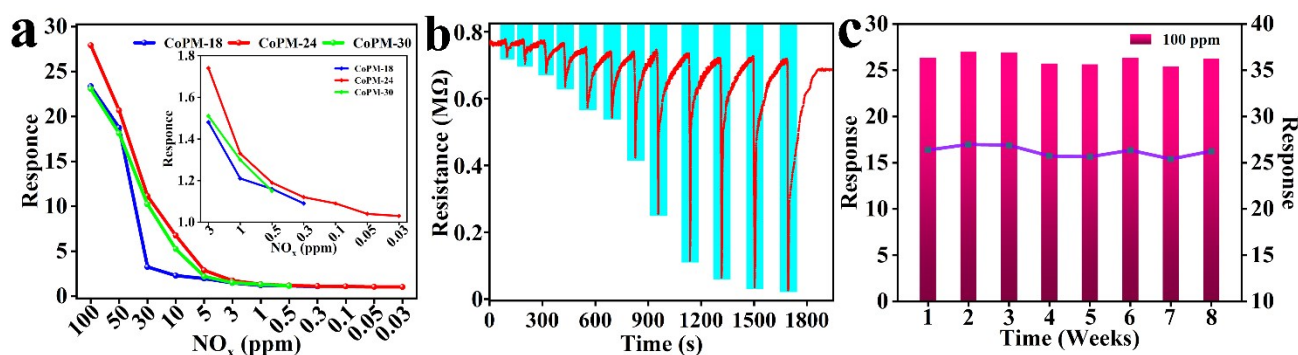

Fig. S8 The gas sensitive line chart (a), the transient dynamical responses to 0.03 ~ 100 ppm NO<sub>x</sub> (b), the stability to 100 ppm NO<sub>x</sub> gases detecting day for 8 weeks (c) of the CoPM-24 sensor.

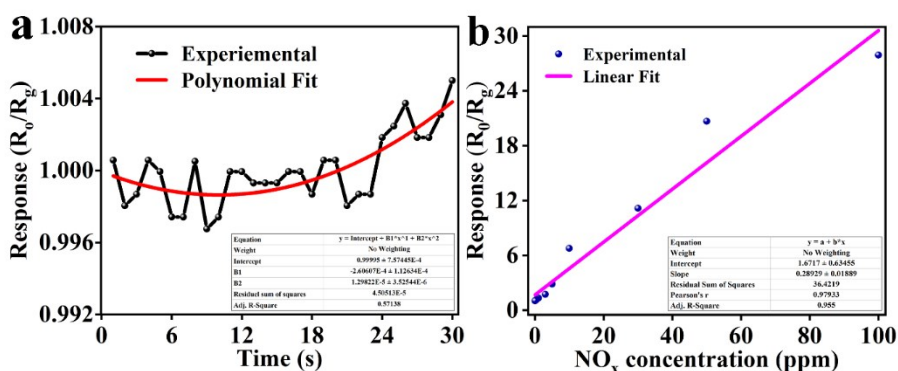

Fig. S9 (a) The curve with detailed data obtained by polynomial fitting the first 30 response points in the response-time baseline of the CoPM-24 gas sensor before the injection of NO<sub>x</sub>. The response values before and after fitting are recorded as S<sub>i</sub> and S, respectively, (b) the curve with detailed data obtained by linear fitting the response points in the NO<sub>x</sub> sensing measurement of Fig. 5d.

### Calculation for limit of detection (LOD):

The theoretical LOD were calculated using the variation in the gas response at base line using the root mean square deviation (rms noise). For polynomial fitting, we took 30 experimental data point from Fig. 5a. According to the formula (1) below, and  $S_i$  and  $S$  obtained by the polynomial fit method in Fig. S9a,  $Vx^2$  can be calculated as follow. [S5, S6]

$$Vx^2 = \Sigma(S_i - S)^2 \quad (1) \text{ [S5, S6]}$$

$$Vx^2 = 0.00004496$$

In terms of the root mean square (rms), i.e., formula (2),  $rms_{\text{noise}}$  can be calculated as follows.

$$rms = \sqrt{Vx^2/n} \quad (n = 20) \quad (2) \text{ [S5, S6]}$$

$$rms = 0.00122$$

Finally, according to the formula (3) and the value of slope (0.28929) obtained from Fig. S9b, the theoretic Limit of detection (LOD) can be calculated:

$$LOD = 3 * (rms/slope) \quad (3) \text{ [S5, S6]}$$

$$LOD = 0.0127 \text{ ppm or } 12.7 \text{ ppb}$$

Therefore, the theoretical detection limit of 12.7 ppb to  $\text{NO}_x$  at RT.

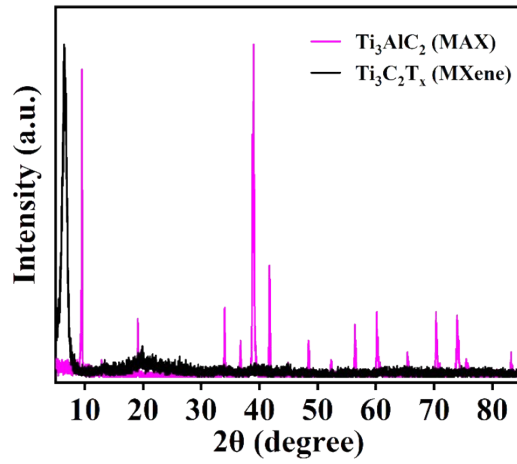

**Fig. S10** XRD patterns of  $\text{Ti}_3\text{AlC}_2$  (MAX) and  $\text{Ti}_3\text{C}_2\text{T}_x$  (MXene).

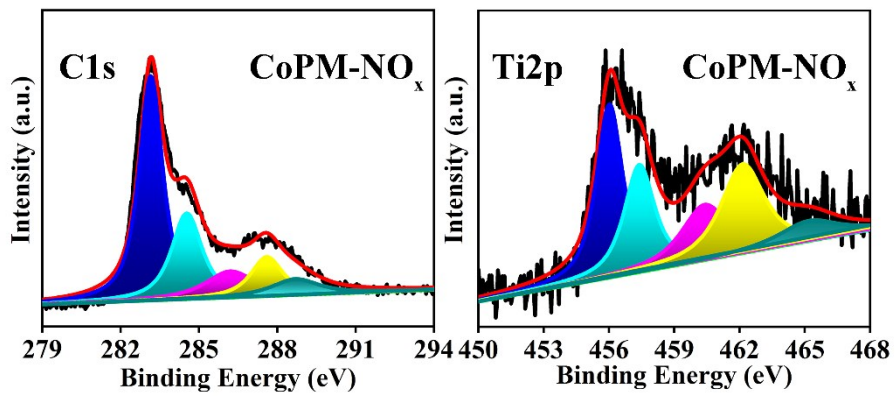

**Fig. S11** XPS spectra of CoPM-24 in  $\text{NO}_x$  adsorption (a) C1s XPS spectra; (b) Ti2p XPS spectra

**Table S2** Response, response time and recovery time of CoPM-18, CoPM-24 and CoPM-30 sensors.

| Sensors<br>NO <sub>2</sub> (ppm) | CoPM-18 |                |                | CoPM-24 |                |                | CoPM-30 |                |                |
|----------------------------------|---------|----------------|----------------|---------|----------------|----------------|---------|----------------|----------------|
|                                  | R       | T <sub>s</sub> | T <sub>r</sub> | R       | T <sub>s</sub> | T <sub>r</sub> | R       | T <sub>s</sub> | T <sub>r</sub> |
| 100                              | 23.35   | 2.13           | 102.93         | 27.92   | 1.60           | 73.07          | 23.06   | 2.13           | 90.67          |
| 50                               | 18.75   | 2.13           | 92.27          | 20.68   | 1.60           | 81.07          | 18.12   | 2.13           | 89.07          |
| 30                               | 3.25    | 3.20           | 86.93          | 11.15   | 1.60           | 78.93          | 10.23   | 2.67           | 81.60          |
| 10                               | 2.29    | 5.33           | 82.13          | 6.76    | 2.13           | 74.67          | 5.26    | 2.67           | 78.40          |
| 5                                | 1.97    | 4.27           | 75.73          | 2.87    | 2.67           | 61.33          | 2.20    | 2.67           | 67.20          |
| 3                                | 1.48    | 4.27           | 65.60          | 1.74    | 3.20           | 59.20          | 1.51    | 4.27           | 60.27          |
| 1                                | 1.21    | 4.27           | 64.53          | 1.33    | 3.20           | 38.40          | 1.30    | 4.80           | 42.67          |
| 0.5                              | 1.16    | 5.87           | 49.07          | 1.19    | 3.73           | 29.87          | 1.15    | 6.40           | 30.40          |
| 0.3                              | 1.09    | 6.40           | 40.53          | 1.12    | 3.73           | 17.07          |         |                |                |
| 0.1                              |         |                |                | 1.09    | 4.27           | 13.33          |         |                |                |
| 0.05                             |         |                |                | 1.04    | 4.80           | 7.47           |         |                |                |
| 0.03                             |         |                |                | 1.03    | 4.80           | 5.87           |         |                |                |

\*R: Response    T<sub>s</sub>: Response time    T<sub>r</sub>: Recovery time

**Table S3** Peaks positions (eV) of the XPS analysis results to Pure MXene, CoPM-24 and CoPM-NO<sub>x</sub>

| Elements | Peak position (eV)                      |                                                |                                                |
|----------|-----------------------------------------|------------------------------------------------|------------------------------------------------|
|          | MXene                                   | CoPM-24                                        | CoPM-NO <sub>x</sub>                           |
| Ti2p     | 455.2, 456.6, 459.3,<br>461.6 and 464.7 | 455.6, 456.9, 460.1,<br>461.8 and 464.8        | 456.0, 457.4, 460.4,<br>462.2 and 465.2        |
| C1s      | 282.0, 283.5, 286.5 and<br>288.0        | 282.4, 283.7, 285.8,<br>286.9 and 288.8        | 283.2, 284.6, 286.3<br>287.6 and 288.9         |
| O1s      | 530.3, 531.7 and 532.9                  | 530.4, 532.0 and 534.9                         | 532.0, 533.3 and 535.6                         |
| Co2p     | -                                       | 779.1, 781.8, 785.6,<br>795.3, 800.1 and 803.4 | 779.8, 782.9, 786.6,<br>795.8, 800.3 and 804.2 |
| N1s      | -                                       | 398.5                                          | 399.4, 404.0 and 407.6                         |



## References

- S1. A. Hermawan, B. Zhang, A. Taufik, Y. ASakura, T. Hasegawa, J. Zhu, P. Shi and S. Yin, *ACS Appl. Nano Mater.*, 2020, 3, 4755–4766.
- S2. T. He, W. Liu, T. Lv, M. Ma, Z. Liu, A Vasiliev and X. Li, *Sens. Actuators, B*, 329 (2021) 129275.
- S3. L. Jin, C. Wu, K. Wei, L. He, H. Gao, H. Zhang, K Zhang, A. M. Asiri, K. A. Alamry, L. Yang and X. Chu, *ACS Appl. Nano Mater.*, 2020, 3, 12071–12079.
- S4. M. Wu, M. He, Q. Hu, Q. Wu, G. Sun, L. Xie, Z. Zhang, Z. Zhu and A. Zhou, *ACS Sens.*, 2019, 4, 2763–2770.
- S5. V. Dua, S. P. Surwade, S. Ammu, S. R. Agnihotra, S. Jain, K. E. Roberts, S. Park, R. S. Ruoff, and S. K. Manohar, *Angew. Chem.*, 2010, 122, 2200–2203.
- S6. J. Li, Y. Lu, Q. Ye, M. Cinke, J. Han and M. Meyyappan, *Nano Lett.*, Vol. 3, No. 7, 2003.
